# Supplementary material for: Identification of TiO2 nanoparticles using La and Ce as labels: application to the evaluation of surface contamination during the handling of nanosized matter
Source: Royal Society of Chemistry journal article supplement (doi:10.1039/c4en00060a), 2014-01-01

## Supplementary information

**Supplementary Figure 1.** Particle number concentration of emissions produced during a pouring experiment using an Optical Particle Counter (OPC).

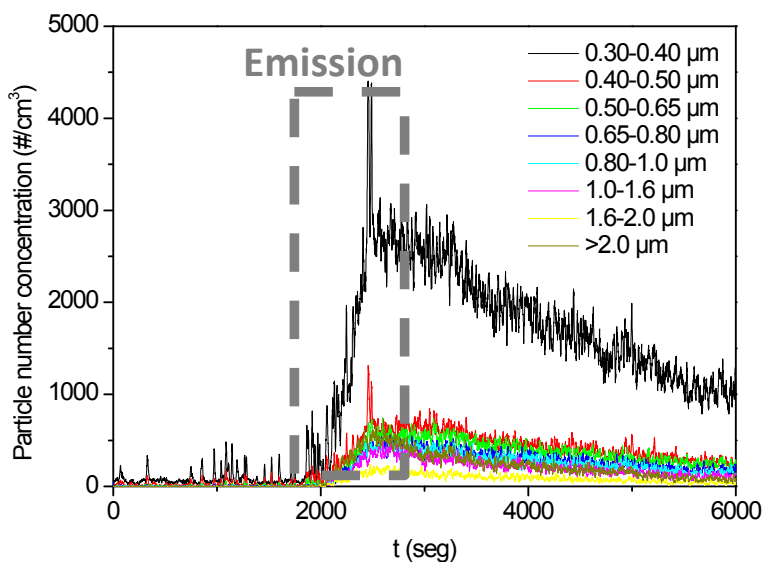

**Supplementary Figure 2.** Scheme of the nanoparticle surface contamination removal efficiency method

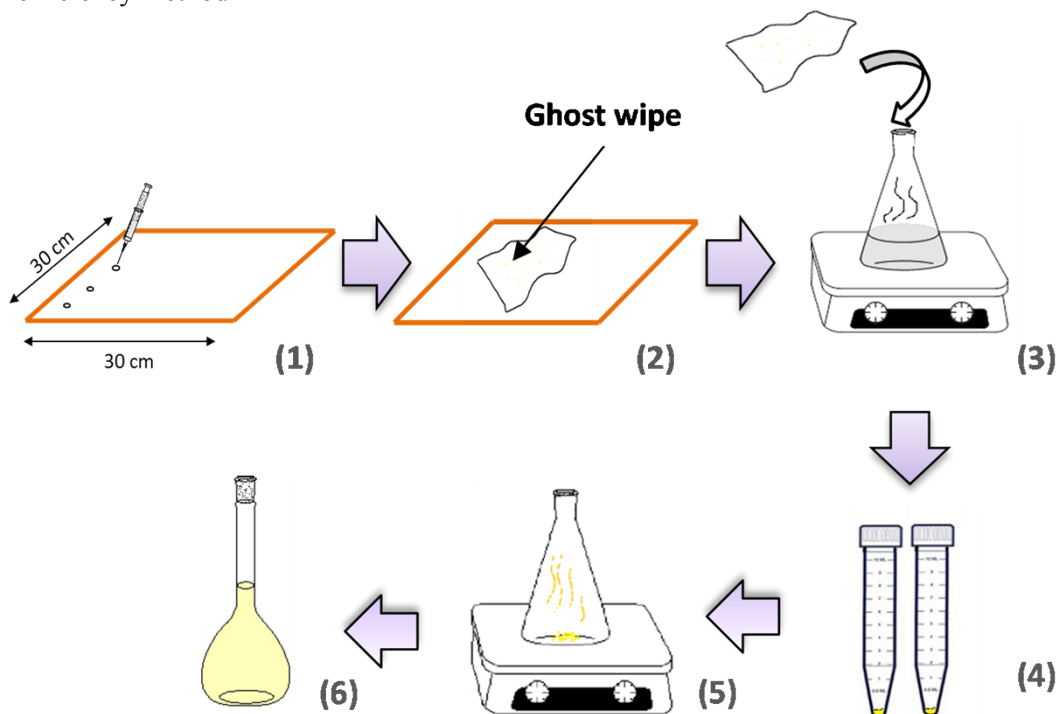

**(1) Particle deposition (2) surface cleaning (3) GW in hot water (4) centrifugation (5) digestion (6) ICP-OES analysis**

**Supplementary Figure 3.** a) SEM image of particles settled on a carbon tape placed at 10 cm away from the source during the manipulation of La/TiO<sub>2</sub> nanoparticulate powders; (b, c and d) Magnification of areas marked with 1 and 2 and 3 in (a); insets show the EDX spectral analysis of the areas marked with 1, 2 and 3; e) STEM of the airborne matter collected by filtering the air around the manipulation area at 0.3 L·min<sup>-1</sup> through a Cu grid during the manipulation of La-labelled TiO<sub>2</sub> nanoparticulate powders and EDX spectral analysis of the visualized area.

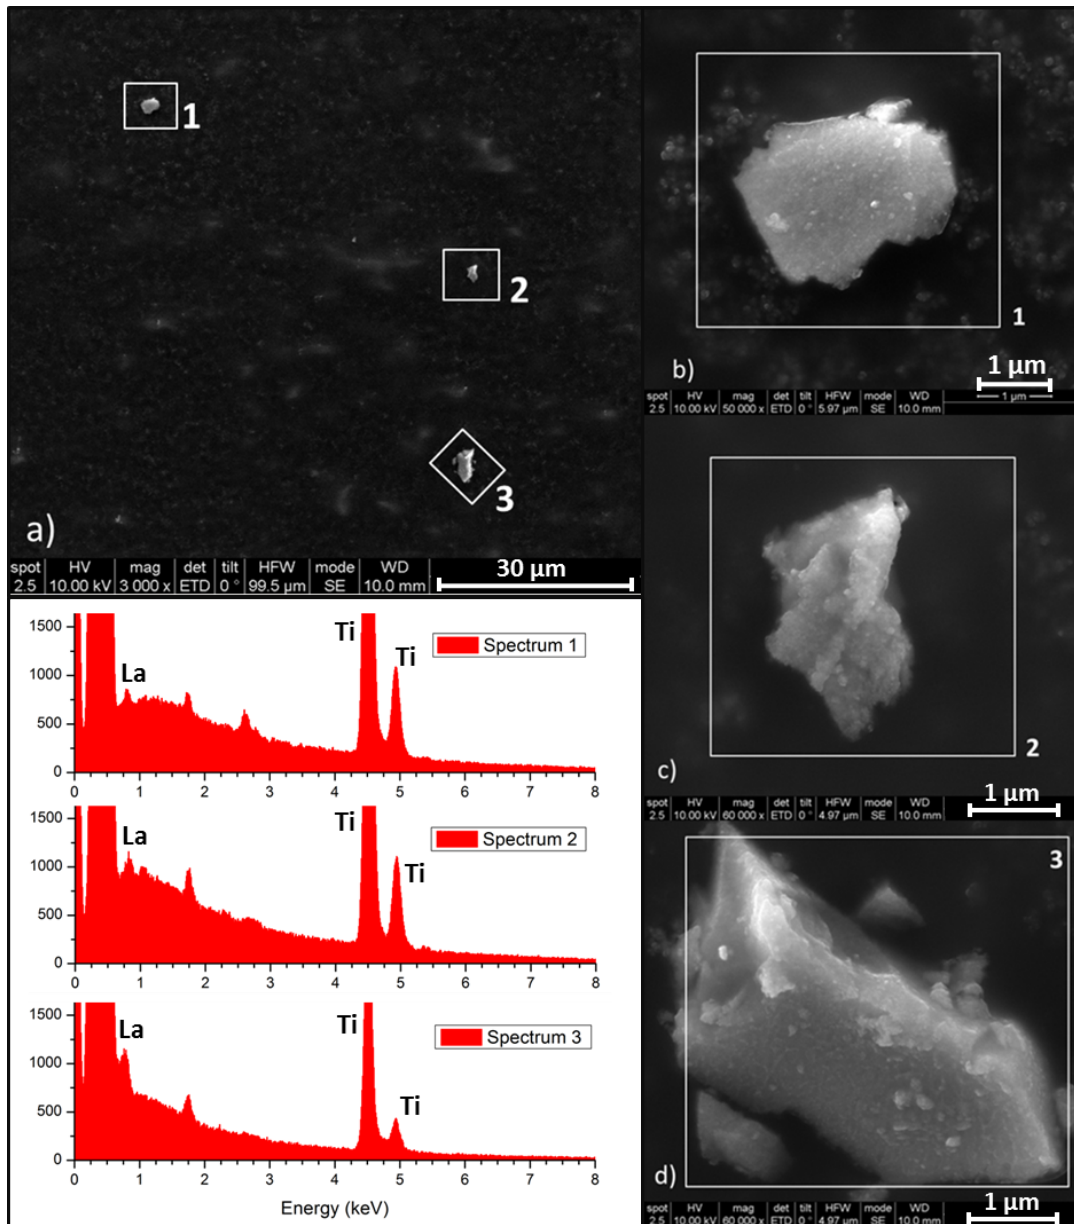

e)

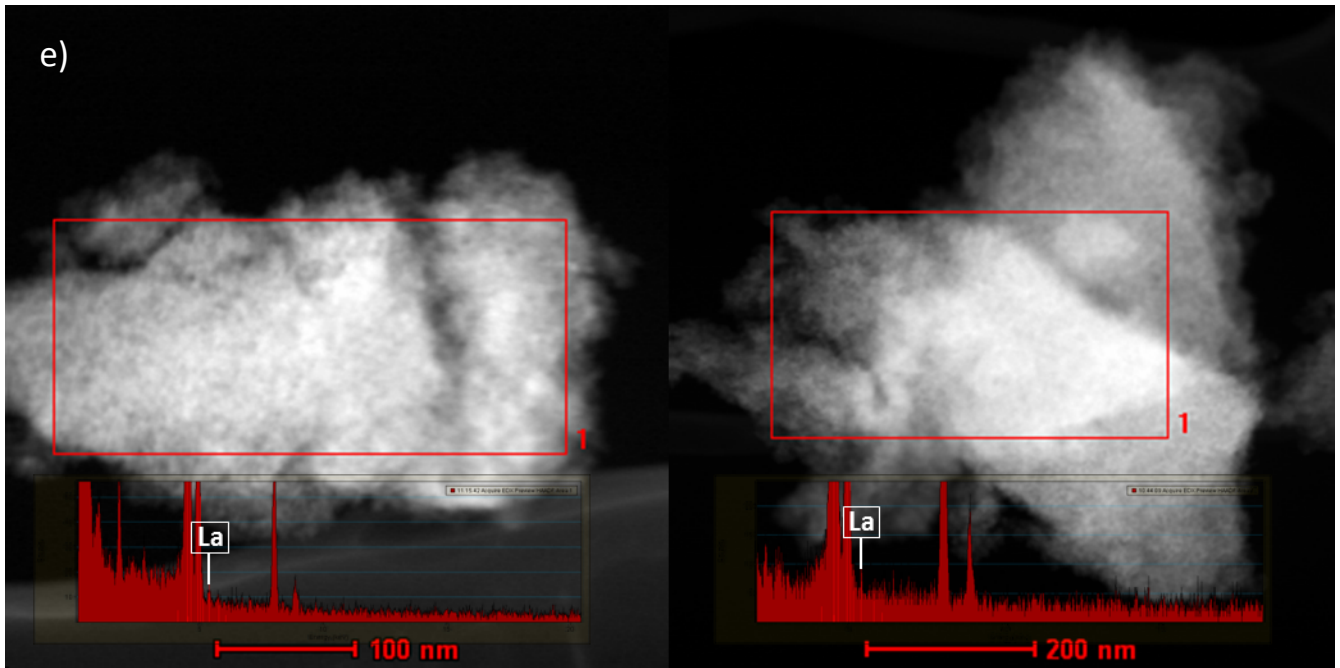

Supplement: c4en00060a1.pdf [file c4en00060a1.pdf]
